# Supplementary material for: Establishment and Characterization of MUi027-A: A Novel Patient-Derived Cell Line of Polycystic Kidney Disease with PKD1 Mutation
Source: MDPI journal article supplement (doi:10.3390/jpm12050766), 2022-05-09
Supplement: s1 [file s1]

**Table S2.** List of antibodies.

|                         | <b>Antibody</b>                                                          | <b>Dilution</b> | <b>Company Cat # and RRID</b>                           |
|-------------------------|--------------------------------------------------------------------------|-----------------|---------------------------------------------------------|
| Pluripotency markers    | Mouse anti-OCT4                                                          | 1:100           | Santa Cruz Cat# SC-5279, RRID: AB_628051                |
|                         | Rabbit anti-NANOG                                                        | 1:100           | Santa Cruz Cat# SC-33759, RRID: AB_2150401              |
| Differentiation Markers | Mouse anti- $\beta$ 3 tubulin (ectodermal)                               | 1:100           | Santa Cruz Cat# sc-51670, RRID: AB_630408               |
|                         | Mouse anti-SMA (mesodermal)                                              | 1:100           | Santa Cruz Cat# sc-53142, RRID: AB_2273670              |
|                         | Goat anti-AFP (endodermal)                                               | 1:100           | Santa Cruz Cat# sc-8108, RRID: AB_633815                |
|                         | Mouse anti-E Cadherin                                                    | 1:250           | Abcam Cat#ab1416, RRID: AB_300946                       |
|                         | Mouse anti-E Cadherin                                                    | 1:250           | Vector Laboratories Cat# FL-1321-2 RRID: AB_2336559     |
|                         | Lotus Tetragonolobus Lectin (LTL), FITC-conjugated Anti-nephrin Antibody | 1:100           | R&D systems Cat# AF-4269                                |
| Secondary antibodies    | Alexa Flour 594 goat anti-mouse IgG (H+L)                                | 1:1000          | Thermo Fisher Scientific Cat# A11005, RRID: AB_2534073  |
|                         | Alexa Flour 488 goat anti-rabbit IgG (H+L)                               | 1:1000          | Thermo Fisher Scientific Cat# A11008, RRID: AB_143165   |
|                         | Alexa Flour 488 goat anti-mouse IgG (H+L)                                | 1:1000          | Thermo Fisher Scientific Cat# A11001, RRID: AB_2534069  |
|                         | Alexa Flour 488 goat anti-mouse IgG (H+L)                                | 1:1000          | Thermo Fisher Scientific Cat# A11058, RRID: AB_2534105  |
|                         | Alexa Flour 594 donkey anti-Goat IgG (H+L)                               | 1:1000          | Thermo Fisher Scientific Cat# A21448, RRID: AB_10374882 |
|                         | Alexa Flour 647 donkey Anti-Sheep IgG (H&L)                              |                 |                                                         |
|                         |                                                                          |                 |                                                         |
|                         |                                                                          |                 |                                                         |
