# Supplementary material for: Establishment and Characterization of MUi027-A: A Novel Patient-Derived Cell Line of Polycystic Kidney Disease with PKD1 Mutation
Source: MDPI journal article supplement (doi:10.3390/jpm12050766), 2022-05-09
Supplement: s1 [file s1]

**Table S1.** List of primers

|                                   | Target                                                              | Forward/Reverse primer (5'-3')                                                                                                                                                                                                                                                                                                 |
|-----------------------------------|---------------------------------------------------------------------|--------------------------------------------------------------------------------------------------------------------------------------------------------------------------------------------------------------------------------------------------------------------------------------------------------------------------------|
| EBNA1                             | EBNA1                                                               | F: ATCGTCAAAGCTGCACACAG /R: CCCAGGAGTCCCAGTAGTCA                                                                                                                                                                                                                                                                               |
| Pluripotency<br>Markers<br>(qPCR) | DNMT3B<br>OCT4<br>GDF3<br>NANOG<br>GABRB3<br>SOX2<br>TDGF1<br>GAPDH | HS00171876_m1<br>HS03005111_g1<br>HS00220998_m1<br>HS02387400_g1<br>HS00241459_m1<br>HS00602736_s1<br>HS02339497_g1<br>HS99999905_m1                                                                                                                                                                                           |
| Pluripotency<br>Markers<br>(qPCR) | <i>Pax6</i><br><i>Sox17</i><br><i>FoxA2</i><br>TBX6<br>TBXT<br>SOX1 | F: TGGGCAGGTATTACGAGACTG /R: ACTCCCGCTTATACTGGGCTA<br>F: GAGCCAAGGGCGAGTCCCGTA /R: CCTTCCACGACTTGCCCAGCAT<br>F: GGAGCAGCTACTATGCAGAGC /R: CGTGTTTCATGCCGTTTCATCC<br>F: CATCCACGAGAATTGTACCCG /R: AGCAATCCAGTTTAGGGGTGT<br>F: ACCCAGTTCATAGCGGTGAC /R: CCATTGGGAGTACCCAGGTT<br>F: CAGTACAGCCCCATCTCCAAC /R: GCGGGCAAGTACATGCTGA |
